# Supplementary material for: Physical, emotional and sexual adolescent abuse victimisation in South Africa: prevalence, incidence, perpetrators and locations
Source: PubMed Central journal article supplement (PMC5013157; doi:10.1136/jech-2015-205860), 2016-03-09
Supplement: jech-2015-205860supp1.pdf [file jech-2015-205860supp1.pdf]

**Supplement 1: Questionnaire items for Child physical and emotional abuse victimisation**

**Source:**            **Questionnaire items:**

---

UNICEF Measures for National-level Monitoring of Orphans and Other Vulnerable Children

How often in the past year did an adult...

- 1) use a stick, belt or other hard item to hit you?
- 2) slap, punch or hit you so that it hurt?
- 3) threaten to send you away or kick you out of the house?
- 4) threaten to invoke ghosts or evil spirits or harmful people?
- 5) call you dumb, lazy or other names?
- 6) withhold a meal to punish you?\*
- 7) single you out to do household chores all day instead of school or play?\*

Items design by local social workers, NGO staff, children from the local community.

- 8) make you stand or kneel in an uncomfortable position for a long period of time to punish you?\*
- 9) threaten to hurt you or give you bad grades?\*
- 10) insult members of your family that have passed away?\*
- 11) tell you t hey wished they did not have to look after you or make you feel you are a burden
- 12) threaten to leave you and never come back?\*
- 13) make you feel unwelcome at home?\*
- 14) threaten to hurt or kill a person or an animal that you care about?\*

\*Administered at follow-up assessment only.
